# Supplementary material for: Favorable Changes in Biomarkers of Potential Harm to Reduce the Adverse Health Effects of Smoking in Smokers Switching to the Menthol Tobacco Heating System 2.2 for 3 Months (Part 2)
Source: PubMed Central journal article supplement — Nicotine Tob Res. 2019 May 24;22(4):549–59. doi: 10.1093/ntr/ntz084 (PMC7164580; doi:10.1093/ntr/ntz084), 2019-05-24

## Supplementary Material

**Supplementary Table 1. Schedule of Assessments.**

| <b>BOPH</b>             | <b>Day 0<br/>(Baseline)</b> | <b>Day 5/6</b> | <b>Day 30/31</b> | <b>Day 60/61</b> | <b>Day 90/91</b> |
|-------------------------|-----------------------------|----------------|------------------|------------------|------------------|
| WBC count               | ●                           | ●              | ●                | ●                | ●                |
| HDL-cholesterol         | ●                           | ○              | ●                | ●                | ●                |
| LDL-cholesterol         | ●                           | ○              | ●                | ●                | ●                |
| TG                      | ●                           | ○              | ●                | ●                | ●                |
| TC                      | ●                           | ○              | ●                | ●                | ●                |
| Apo A1                  | ●                           | ○              | ○                | ○                | ●                |
| Apo B                   | ●                           | ○              | ○                | ○                | ●                |
| s-ICAM-1                | ●                           | ●              | ●                | ●                | ●                |
| 8-epi-PGF <sub>2α</sub> | ●                           | ●              | ●                | ●                | ●                |
| 11-DTX-B2               | ●                           | ●              | ●                | ●                | ●                |
| Glucose                 | ●                           | ○              | ●                | ●                | ●                |
| HbA1C                   | ●                           | ○              | ○                | ○                | ●                |
| Weight                  | ●                           | ○              | ○                | ○                | ●                |
| Waist circumference     | ●                           | ○              | ○                | ○                | ●                |
| Fibrinogen              | ●                           | ○              | ●                | ●                | ●                |
| Homocysteine            | ●                           | ○              | ●                | ●                | ●                |
| hs-CRP                  | ●                           | ○              | ●                | ●                | ●                |
| Blood pressure          | ●                           | ●              | ●                | ●                | ●                |
| FEV <sub>1</sub>        | ●                           | ●              | ○                | ○                | ●                |

Abbreviations: 8-epi-PGF<sub>2α</sub> = 8-epi-prostaglandin F<sub>2α</sub>; 11-DTX-B2 = 11-dehydro-thromboxane B2; Apo A1 = apolipoprotein A1; Apo B = apolipoprotein B; BOPH = biomarker of potential harm; FEV<sub>1</sub> = forced expiratory volume in 1 second; HbA1C = hemoglobin A1c; HDL = high density lipoprotein; hs-CRP = high-sensitivity C-reactive protein; LDL = low density lipoprotein; s-ICAM-1= soluble inter-cellular adhesion molecule; TC = total cholesterol; TG = triglycerides; WBC = white blood cells.

## References

*(Continued from main manuscript)*

50. Oguogho A, Mehrabi M, Sinzinger H. Increased plasma, serum and urinary 8-epi-prostaglandin F2 alpha in heterozygous hypercholesterolemia. *Wien Klin Wochenschr.* 1999;111(3):113-118.
51. Ludviksdottir D, Blondal T, Franzon M, Gudmundsson TV, Sawe U. Effects of nicotine nasal spray on atherogenic and thrombogenic factors during smoking cessation. *Journal of Internal Medicine.* 1999;246(1):61-66.
52. Meenakshisundaram R, Rajendiran C, Thirumalaikolundusubramanian P. Lipid and lipoprotein profiles among middle aged male smokers: a study from southern India. *Tob Induc Dis.* 2010;8:11.
53. Willemse BW, ten Hacken NH, Rutgers B, Lesman-Leegte IG, Postma DS, Timens W. Effect of 1-year smoking cessation on airway inflammation in COPD and asymptomatic smokers. *Eur Respir J.* 2005;26(5):835-845.
54. Oguogho A, Lupattelli G, Palumbo B, Sinzinger H. Isoprostanes quickly normalize after quitting cigarette smoking in healthy adults. *Vasa.* 2000;29(2):103-105.
55. Morrow JD, Frei B, Longmire AW, et al. Increase in circulating products of lipid peroxidation (F2-isoprostanes) in smokers. Smoking as a cause of oxidative damage. *N Engl J Med.* 1995;332(18):1198-1203.
56. Tonstad S, Cowan JL. C-reactive protein as a predictor of disease in smokers and former smokers: a review. *Int J Clin Pract.* 2009;63(11):1634-1641.

57. Roulet S, Magnani P, Kallischnigg G, et al. How Do Consumers Use the Candidate Modified Risk Tobacco Product (MRTP): Tobacco Heating System (THS): Analysis of Data from Six Countries. 2017;Poster presented at the CORESTA Smoke Science and Product Technology Joint Study Groups Meeting in Kitzbühel, Austria, from 8-12 October 2017. Available from: [https://www.pmiscience.com/library/publication/how-do-consumers-use-the-candidate-modified-risk-tobacco-product-\(mrtp\)-tobacco-heating-system-\(ths\)-analysis-of-data-from-six-countries](https://www.pmiscience.com/library/publication/how-do-consumers-use-the-candidate-modified-risk-tobacco-product-(mrtp)-tobacco-heating-system-(ths)-analysis-of-data-from-six-countries) (Accessed on 10 April 2019).
58. Schaller J-P, Keller D, Poget L, et al. Evaluation of the Tobacco Heating System 2.2. Part 2: Chemical composition, genotoxicity, cytotoxicity, and physical properties of the aerosol. *Regulatory Toxicology and Pharmacology*. 2016;Suppl 2. Available from: <http://www.sciencedirect.com/science/article/pii/S0273230016302902> (Accessed on 03 May 2017):S27-47.
59. Jaccard G, Tabin Djoko D, Moennikes O, Jeannet C, Kondylis A, Belushkin M. Comparative assessment of HPHC yields in the Tobacco Heating System THS2.2 and commercial cigarettes. *Regul Toxicol Pharmacol*. 2017;90:1-8.
60. Pratte P, Cosandey S, Goujon Ginglinger C. Investigation of solid particles in the mainstream aerosol of the Tobacco Heating System THS2.2 and mainstream smoke of a 3R4F reference cigarette. *Human & Experimental Toxicology*. 2016:0960327116681653.
61. Farsalinos KE, Yannovits N, Sarri T, Voudris V, Poulas K, Leischow S. Carbonyl emissions from a novel heated tobacco product (IQOS): comparison with an e-cigarette and a tobacco cigarette. *Addiction*. 2018.

62. Mallock N, Böss L, Burk R, et al. Levels of selected analytes in the emissions of “heat not burn” tobacco products that are relevant to assess human health risks. *Archives of Toxicology*. 2018;92(6):2145-2149.
63. Zanetti F, Titz B, Sewer A, et al. Comparative systems toxicology analysis of cigarette smoke and aerosol from a candidate modified risk tobacco product in organotypic human gingival epithelial cultures: A 3-day repeated exposure study. *Food and Chemical Toxicology*. 2017;101:15-35.
64. Ludicke F, Picavet P, Baker G, et al. Effects of switching to the Tobacco Heating System 2.2 Menthol, smoking abstinence, or continued cigarette smoking on biomarkers of exposure: a randomized, controlled, open-label, multicenter study in sequential confinement and ambulatory settings (Part 1). *Nicotine Tob Res*. 2018;20(2):161-172.
65. Frost-Pineda K, Liang Q, Liu J, et al. Biomarkers of potential harm among adult smokers and nonsmokers in the total exposure study. *Nicotine Tob Res*. 2011.
66. Garrison R, Wilson P, Castelli W, Feinleib M, Kannel W, McNamara P. Obesity and lipoprotein cholesterol in the Framingham offspring study. *Metabolism*. 1980;29(11):1053-1060.
67. Lamon-Fava S, Wilson PW, Schaefer EJ. Impact of body mass index on coronary heart disease risk factors in men and women. The Framingham Offspring Study. *Arterioscler Thromb Vasc Biol*. 1996;16(12):1509-1515.
68. Despres J-P, Moorjani S, Lupien PJ, Tremblay A, Nadeau A, Bouchard C. Regional distribution of body fat, plasma lipoproteins, and cardiovascular disease. *Arterioscler Thromb Vasc Biol*. 1990;10(4):497-511.

69. Schulte H, Cullen P, Assmann G. Obesity, mortality and cardiovascular disease in the Munster Heart Study (PROCAM). *Atherosclerosis*. 1999;144(1):199-209.
70. Rodriguez-Hernandez H, Simental-Mendia LE, Rodriguez-Ramirez G, Reyes-Romero MA. Obesity and inflammation: epidemiology, risk factors, and markers of inflammation. *Int J Endocrinol*. 2013;2013:678159.

**Supplementary Figure 1. Biomarkers of Potential Harm % mTHS:SA Ratios (Upper Panel) and mTHS – SA Differences (Lower Panel) with 95% Confidence Intervals on Day 90, for Overweight (Red Dashed Lines) and Normal Weight (Black Solid Lines) Subjects (\*: p < 0.05).**

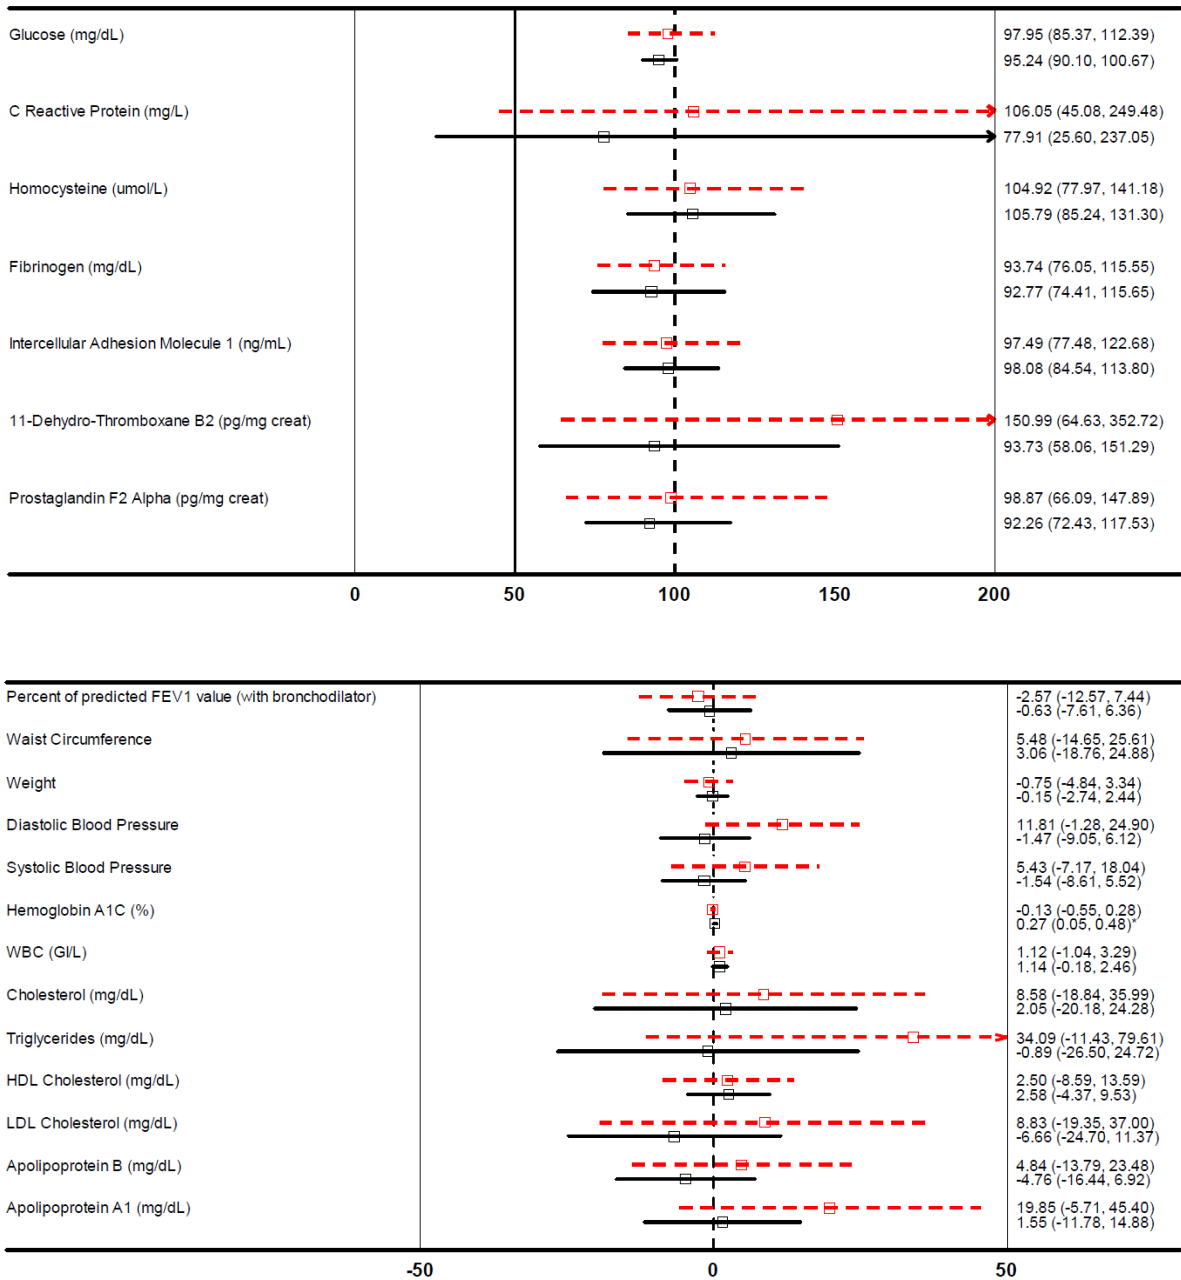

Supplement: ntz084_suppl_supplementary-file.pdf [file ntz084_suppl_supplementary-file.pdf]
